# Supplementary material for: Plasma vascular endothelial growth factor B is elevated in non-alcoholic fatty liver disease patients and associated with blood pressure and renal dysfunction
Source: PubMed Central journal article supplement (PMC7783472; doi:10.17179/excli2020-2647), 2020-08-20
Supplement: EXCLI-19-1186-s-001.pdf [file EXCLI-19-1186-s-001.pdf]

**Supplementary material to:**

**PLASMA VASCULAR ENDOTHELIAL GROWTH FACTOR B IS  
ELEVATED IN NON-ALCOHOLIC FATTY LIVER DISEASE  
PATIENTS AND ASSOCIATED WITH BLOOD PRESSURE AND  
RENAL DYSFUNCTION**

Xiaofeng Ye<sup>1,2#</sup>, Wen Kong<sup>1,2#</sup>, Mohammad Ishraq Zafar<sup>3</sup>, Junchao Zeng<sup>4</sup>, Rui Yang<sup>4</sup>,  
Lu-Lu Chen<sup>1,2,\*</sup>

<sup>1</sup> Department of Endocrinology, Union Hospital, Tongji Medical College, Huazhong University of Science and Technology, Wuhan 430022, China

<sup>2</sup> Hubei provincial Clinical Research Center for Diabetes and Metabolic Disorders, Wuhan 430022, China

<sup>3</sup> Institute of Reproductive Health, Tongji Medical College, Huazhong University of Science and Technology, Wuhan 430030, China

<sup>4</sup> Healthcare Center, Union Hospital, Tongji Medical College, Huazhong University of Science and Technology, Wuhan 430022, China

# Xiaofeng Ye and Wen Kong contributed equally to the manuscript.

\* **Corresponding author:** Lu-Lu Chen, M.D., Ph.D., Department of Endocrinology, Union Hospital, Tongji Medical College, Huazhong University of Science and Technology, Wuhan 430022, China. Tel.: +86-02785726799; E-mail: [cheria\\_chen@126.com](mailto:cheria_chen@126.com)

<http://dx.doi.org/10.17179/excli2020-2647>

This is an Open Access article distributed under the terms of the Creative Commons Attribution License (<http://creativecommons.org/licenses/by/4.0/>).

**Supplementary Table 1:** Univariate analysis of variables associated with circulating VEGF-B levels in the study population

| Variable      | $\beta$ | P-value |
|---------------|---------|---------|
| age           | 0.044   | 0.548   |
| SBP           | 0.190   | 0.009   |
| DBP           | 0.294   | 0.000   |
| Weight        | 0.162   | 0.025   |
| BMI           | 0.122   | 0.091   |
| UA            | 0.301   | 0.000   |
| BUN           | -0.044  | 0.548   |
| Cr            | 0.245   | 0.001   |
| CysC          | 0.352   | 0.000   |
| eGFR          | -0.185  | 0.010   |
| TB            | -0.067  | 0.363   |
| CB            | -0.032  | 0.660   |
| ALT           | 0.070   | 0.338   |
| AST           | 0.104   | 0.155   |
| ALP           | 0.083   | 0.260   |
| $\gamma$ -GT  | 0.242   | 0.001   |
| Total Protein | -0.075  | 0.310   |
| Albumin       | -0.170  | 0.020   |
| Globulin      | 0.037   | 0.617   |
| A/G           | -0.117  | 0.111   |
| TG            | 0.198   | 0.006   |
| TC            | 0.063   | 0.382   |
| HDL-C         | -0.223  | 0.002   |
| LDL-C         | 0.102   | 0.159   |
| FPG           | 0.051   | 0.495   |
| HbA1C         | 0.089   | 0.282   |
| Ins           | 0.140   | 0.054   |
| HOMA-IR       | 0.174   | 0.019   |

SBP, systolic blood pressure; DBP, diastolic blood pressure; BMI, body mass index; UA, uric acid; BUN, blood urea nitrogen; Cr, Creatinine; CysC, CystatinC; eGFR, estimated glomerular filtration rate; TB, total bilirubin; CB, conjugated bilirubin; ALT, alanine aminotransferase; AST, aspartate aminotransferase; ALP, alkaline phosphatase;  $\gamma$ -GT,  $\gamma$ -glutamyl transpeptidase; TG, total triglyceride; TC, total cholesterol; HDL-C, high-density lipoprotein cholesterol; LDL-C, low-density lipoprotein cholesterol; FPG, fasting plasma glucose; HbA1C, glycosylated hemoglobin; Ins, insulin; HOMA-IR, homeostatic model assessment for insulin resistance
